# Supplementary material for: The diet of otters ( Lutra lutra ) on the Agri river system, one of the most important presence sites in Italy: a molecular approach
Source: PeerJ journal article supplement (doi:10.7717/peerj.9606), 2020-07-29
Supplement: Supplemental_information_REV.pdf [file Supplemental_information_REV.pdf]

## Supplemental information

### Valuation of primers

The 16Smam\_1 (5'-CGGTTGGGGTGACCTCGGA-3) and 16Smam\_2 (5'-GCTGTTATCCCTAGGGTAACT-3') primers (Tylor *et al.*, 1999) were tested to: I) assess their ability to bind and amplify the DNA sequences of the prey of the otter available in study area and II) checked (post-sequencing) if their amplification efficiency could influence the yield in terms of number of reads.

Firstly, using Geneious Primer 2019 v.2.1 (<https://www.geneious.com>), we performed multiple alignments of the primer set with the 16S mtDNA sequences (N = 390) of otter's potential prey in the study area (Caricato *et al.*, 2004), downloaded from National Center for Biotechnology Information (NCBI GenBank) nucleotide database (Table S1). Then, we revealed the number of mismatch between each primer and each sequence and we correlated the number of mismatches between the primer and the sequence assigned to a species with read count assigned to that species.

The primers bind the DNA of all considered potential otter's prey in the study area (fish and amphibian), with a mismatches between primer and prey sequence not higher than 4 (for 16Smam\_1) and 1 (for 16Smam\_2) nucleotide bases.

The correlation between the number of mismatches and the read count does not show a proportional trend between the variables, indeed, in examples, we did not reveal a decrease in read count due to the increase in the number of mismatch (Fig. S1 A and B ).

The spectrum of variation, in terms of read count, which is highlighted at the level of 2 mismatches (for the primer forward, Fig. S1 A) and 0 mismatches (for the primer revers, Fig. S1 B) is always wider than the reads count values with higher mismatches.

**Supplemental Table S1.** List of the mitochondrial DNA sequences that include the 16S rRNA gene (partial or complete), downloaded from National Center for Biotechnology Information (NCBI) GenBank nucleotide database, with their accession number, corresponding organism, description, sequence length and topology. These sequences were used to performed multiple alignments with the primer 16Smam\_1 and 16Smam\_2 sequences, in Geneious Primer 2019 v.2.1 (<https://www.geneious.com>).

| Accession number | Organism                             | Description                                                                                                    | Sequence length | Topology |
|------------------|--------------------------------------|----------------------------------------------------------------------------------------------------------------|-----------------|----------|
| AF404839.1       | <i>Acipenser sturio</i>              | <i>Acipenser sturio</i> 16S ribosomal RNA gene, partial sequence; mitochondrial gene for mitochondrial product | 515             | linear   |
| KP997216.1       | <i>Acipenser sturio</i>              | <i>Acipenser sturio</i> mitochondrion, complete genome                                                         | 16555           | circular |
| NC_027417.1      | <i>Acipenser sturio</i>              | <i>Acipenser sturio</i> mitochondrion, complete genome                                                         | 16555           | circular |
| JQ436546.1       | <i>Alburnus alburnus</i>             | <i>Alburnus alburnus</i> isolate Alb1 16S ribosomal RNA gene, partial sequence; mitochondrial                  | 620             | linear   |
| AB239593.1       | <i>Alburnus alburnus</i>             | <i>Alburnus alburnus</i> mitochondrial DNA, complete genome                                                    | 16605           | circular |
| NC_008659.1      | <i>Alburnus alburnus</i>             | <i>Alburnus alburnus</i> mitochondrion, complete genome                                                        | 16605           | circular |
| AJ247063.1       | <i>Alburnus alburnus</i>             | <i>Alburnus alburnus</i> partial mitochondrial 16S rRNA gene                                                   | 426             | linear   |
| KJ128688.1       | <i>Alburnus alburnus</i>             | <i>Alburnus alburnus</i> voucher NRM:46979 16S ribosomal RNA gene, partial sequence; mitochondrial             | 552             | linear   |
| EU853300.1       | <i>Alburnus arborella</i>            | <i>Alburnus arborella</i> isolate AlbalbBO1 16S ribosomal RNA gene, partial sequence; mitochondrial            | 538             | linear   |
| KF534726.1       | <i>Alburnus chalcoides aralensis</i> | <i>Alburnus chalcoides aralensis</i> mitochondrion, complete genome                                            | 16604           | circular |
| JX844591.1       | <i>Alburnus istanbulensis</i>        | <i>Alburnus istanbulensis</i> mitochondrion, complete genome                                                   | 16612           | circular |
| AP011281.1       | <i>Alburnus mossulensis</i>          | <i>Alburnus mossulensis</i> mitochondrial DNA, complete genome                                                 | 16604           | circular |
| MN122939.1       | <i>Alosa fallax</i>                  | <i>Alosa fallax</i> mitochondrion, partial genome                                                              | 16498           | linear   |
| EU552738.1       | <i>Alosa fallax</i>                  | <i>Alosa fallax</i> voucher H49 16S ribosomal RNA gene, partial sequence; mitochondrial                        | 542             | linear   |

|            |                               |                                                                                                                                                      |       |          |
|------------|-------------------------------|------------------------------------------------------------------------------------------------------------------------------------------------------|-------|----------|
| KC461223.1 | <i>Alosa fallax lacustris</i> | <i>Alosa fallax lacustris</i> voucher<br>CL109 16S ribosomal RNA gene,<br>partial sequence; mitochondrial                                            | 563   | linear   |
| KY231825.1 | <i>Ameiurus melas</i>         | <i>Ameiurus melas</i> isolate<br>A_melas_002 16S ribosomal RNA<br>gene, partial sequence;<br>mitochondrial                                           | 546   | linear   |
| LC198796.1 | <i>Ameiurus melas</i>         | <i>Ameiurus melas</i> mitochondrial<br>gene for 16S ribosomal RNA,<br>partial sequence, isolation_source:<br>aquarium water sample 3                 | 94    | linear   |
| LC198795.1 | <i>Ameiurus melas</i>         | <i>Ameiurus melas</i> mitochondrial<br>gene for 16S ribosomal RNA,<br>partial sequence, isolation_source:<br>laboratory tissue sample<br>A_melas_002 | 99    | linear   |
| KT804702.1 | <i>Ameiurus melas</i>         | <i>Ameiurus melas</i> mitochondrion,<br>complete genome                                                                                              | 16512 | circular |
| DQ421877.1 | <i>Ameiurus melas</i>         | <i>Ameiurus melas</i> voucher LSUBlk2<br>16S ribosomal RNA gene, partial<br>sequence; mitochondrial                                                  | 501   | linear   |
| DQ421876.1 | <i>Ameiurus melas</i>         | <i>Ameiurus melas</i> voucher<br>MTMBL12 16S ribosomal RNA<br>gene, partial sequence;<br>mitochondrial                                               | 501   | linear   |
| AJ247083.1 | <i>Ameiurus melas</i>         | <i>Ictalurus melas</i> partial<br>mitochondrial 16S rRNA gene                                                                                        | 374   | linear   |
| KX440971.1 | <i>Anguilla anguilla</i>      | <i>Anguilla anguilla</i> 16S ribosomal<br>RNA gene, partial sequence;<br>mitochondrial                                                               | 243   | linear   |
| AP007233.1 | <i>Anguilla anguilla</i>      | <i>Anguilla anguilla</i> mitochondrial<br>DNA, complete genome                                                                                       | 16683 | circular |
| U05965.1   | <i>Aphanius fasciatus</i>     | <i>Aphanius fasciatus</i> 16S<br>mitochondrial ribosomal RNA,<br>mitochondrial gene, partial<br>sequence                                             | 439   | linear   |
| KY033528.1 | <i>Aphanius fasciatus</i>     | <i>Aphanius fasciatus</i> voucher<br>UFRJ<museum>:8076 16S<br>ribosomal RNA gene, partial<br>sequence; mitochondrial                                 | 565   | linear   |
| KR476913.1 | <i>Aspius aspius</i>          | <i>Aspius aspius</i> isolate Leuasp1 16S<br>ribosomal RNA gene, partial<br>sequence; mitochondrial                                                   | 511   | linear   |
| KR476832.1 | <i>Aspius aspius</i>          | <i>Aspius aspius</i> isolate Leuasp2 16S<br>ribosomal RNA gene, partial<br>sequence; mitochondrial                                                   | 512   | linear   |
| DQ664301.1 | <i>Aspius aspius</i>          | <i>Aspius aspius</i> isolate vis8 16S<br>ribosomal RNA gene, partial<br>sequence; mitochondrial                                                      | 524   | linear   |

|             |                                      |                                                                                                                 |       |          |
|-------------|--------------------------------------|-----------------------------------------------------------------------------------------------------------------|-------|----------|
| KJ128706.1  | <i>Aspius aspius</i>                 | <i>Aspius aspius</i> voucher NRM:47527<br>16S ribosomal RNA gene, partial<br>sequence; mitochondrial            | 553   | linear   |
| KJ128707.1  | <i>Aspius aspius</i>                 | <i>Aspius aspius</i> voucher NRM:54878<br>16S ribosomal RNA gene, partial<br>sequence; mitochondrial            | 553   | linear   |
| AB849085.1  | <i>Atherina boyeri</i>               | <i>Atherina boyeri</i> mitochondrial<br>gene for 16S rRNA, partial<br>sequence, specimen_voucher:<br>FRLM:37722 | 502   | linear   |
| HM855098.1  | <i>Atherina boyeri</i>               | <i>Atherina boyeri</i> voucher BOAlm1<br>16S ribosomal RNA gene, partial<br>sequence; mitochondrial             | 449   | linear   |
| HM855117.1  | <i>Atherina boyeri</i>               | <i>Atherina boyeri</i> voucher BOTur2<br>16S ribosomal RNA gene, partial<br>sequence; mitochondrial             | 488   | linear   |
| HM855118.1  | <i>Atherina boyeri</i>               | <i>Atherina boyeri</i> voucher BOTur3<br>16S ribosomal RNA gene, partial<br>sequence; mitochondrial             | 488   | linear   |
| HM855130.1  | <i>Atherina boyeri</i>               | <i>Atherina boyeri</i> voucher<br>NPCapZeb2 16S ribosomal RNA<br>gene, partial sequence;<br>mitochondrial       | 447   | linear   |
| HM855125.1  | <i>Atherina boyeri</i>               | <i>Atherina boyeri</i> voucher NPIs1<br>16S ribosomal RNA gene, partial<br>sequence; mitochondrial              | 446   | linear   |
| HM855136.1  | <i>Atherina boyeri</i>               | <i>Atherina boyeri</i> voucher PLav3<br>16S ribosomal RNA gene, partial<br>sequence; mitochondrial              | 446   | linear   |
| HM855137.1  | <i>Atherina boyeri</i>               | <i>Atherina boyeri</i> voucher PLav6<br>16S ribosomal RNA gene, partial<br>sequence; mitochondrial              | 446   | linear   |
| AY749073.1  | <i>Atherina boyeri</i>               | <i>Atherina boyeri</i> voucher UPDBSG<br>0126 16S ribosomal RNA gene,<br>partial sequence; mitochondrial        | 490   | linear   |
| AY749074.1  | <i>Atherina boyeri</i>               | <i>Atherina boyeri</i> voucher UPDBSG<br>0127 16S ribosomal RNA gene,<br>partial sequence; mitochondrial        | 485   | linear   |
| AY749075.1  | <i>Atherina boyeri</i>               | <i>Atherina boyeri</i> voucher UPDBSG<br>0128 16S ribosomal RNA gene,<br>partial sequence; mitochondrial        | 486   | linear   |
| AF237604.1  | <i>Austropotamobius<br/>pallipes</i> | <i>Austropotamobius pallipes</i> F773<br>16S ribosomal RNA gene, partial<br>sequence                            | 513   | linear   |
| KP205430.1  | <i>Austropotamobius<br/>pallipes</i> | <i>Austropotamobius pallipes</i><br>mitochondrion, complete genome                                              | 15679 | circular |
| NC_026560.1 | <i>Austropotamobius<br/>pallipes</i> | <i>Austropotamobius pallipes</i><br>mitochondrion, complete genome                                              | 15679 | circular |
| KR476914.1  | <i>Ballerus sapa</i>                 | <i>Ballerus sapa</i> isolate Balsap1 16S<br>ribosomal RNA gene, partial<br>sequence; mitochondrial              | 510   | linear   |

|             |                             |                                                                                                         |       |          |
|-------------|-----------------------------|---------------------------------------------------------------------------------------------------------|-------|----------|
| KR476833.1  | <i>Ballerus sapa</i>        | <i>Ballerus sapa</i> isolate Balsap2 16S ribosomal RNA gene, partial sequence; mitochondrial            | 516   | linear   |
| JN863593.1  | <i>Barbodes wynaadensis</i> | <i>Barbus wynaadensis</i> voucher NBFGR-CHN-NW2 16S ribosomal RNA gene, partial sequence; mitochondrial | 565   | linear   |
| AB238965.1  | <i>Barbus barbus</i>        | <i>Barbus barbus</i> mitochondrial DNA, complete genome                                                 | 16600 | circular |
| NC_008654.1 | <i>Barbus barbus</i>        | <i>Barbus barbus</i> mitochondrion, complete genome                                                     | 16600 | circular |
| KP712630.1  | <i>Barbus ciscaucasicus</i> | <i>Barbus ciscaucasicus</i> isolate CTOL00102 16S ribosomal RNA gene, partial sequence; mitochondrial   | 591   | linear   |
| AP011322.1  | <i>Barbus ciscaucasicus</i> | <i>Barbus ciscaucasicus</i> mitochondrial DNA, complete genome, except for D-loop                       | 15664 | linear   |
| AJ247065.1  | <i>Barbus fluviatilis</i>   | <i>Barbus fluviatilis</i> partial mitochondrial 16S rRNA gene                                           | 432   | linear   |
| AJ247048.1  | <i>Barbus meridionalis</i>  | <i>Barbus meridionalis</i> partial mitochondrial 16S rRNA gene, isolate 1                               | 424   | linear   |
| AJ247061.1  | <i>Barbus meridionalis</i>  | <i>Barbus meridionalis</i> partial mitochondrial 16S rRNA gene, isolate 2                               | 425   | linear   |
| KR476836.1  | <i>Blicca bjoerkna</i>      | <i>Blicca bjoerkna</i> isolate Blibjo1 16S ribosomal RNA gene, partial sequence; mitochondrial          | 507   | linear   |
| KR476918.1  | <i>Blicca bjoerkna</i>      | <i>Blicca bjoerkna</i> isolate Blibjo2 16S ribosomal RNA gene, partial sequence; mitochondrial          | 508   | linear   |
| AP009304.1  | <i>Blicca bjoerkna</i>      | <i>Blicca bjoerkna</i> mitochondrial DNA, complete genome                                               | 16605 | circular |
| AP011210.1  | <i>Blicca bjoerkna</i>      | <i>Blicca bjoerkna</i> mitochondrial DNA, complete genome                                               | 16603 | circular |
| NC_020355.1 | <i>Blicca bjoerkna</i>      | <i>Blicca bjoerkna</i> mitochondrion, complete genome                                                   | 16605 | circular |
| AJ247064.1  | <i>Blicca bjoerkna</i>      | <i>Blicca bjoerkna</i> partial mitochondrial 16S rRNA gene                                              | 426   | linear   |
| KJ128679.1  | <i>Blicca bjoerkna</i>      | <i>Blicca bjoerkna</i> voucher NRM:47767 16S ribosomal RNA gene, partial sequence; mitochondrial        | 551   | linear   |
| KJ128680.1  | <i>Blicca bjoerkna</i>      | <i>Blicca bjoerkna</i> voucher NRM:47967 16S ribosomal RNA gene, partial sequence; mitochondrial        | 552   | linear   |
| AY500225.1  | <i>Bombina pachypus</i>     | <i>Bombina pachypus</i> haplotype H1 16S ribosomal RNA gene, partial sequence; mitochondrial            | 438   | linear   |

|            |                             |                                                                                                                                                                                                 |      |        |
|------------|-----------------------------|-------------------------------------------------------------------------------------------------------------------------------------------------------------------------------------------------|------|--------|
| AY500226.1 | <i>Bombina pachypus</i>     | <i>Bombina pachypus</i> haplotype H2<br>16S ribosomal RNA gene, partial<br>sequence; mitochondrial                                                                                              | 438  | linear |
| AY500227.1 | <i>Bombina pachypus</i>     | <i>Bombina pachypus</i> haplotype H3<br>16S ribosomal RNA gene, partial<br>sequence; mitochondrial                                                                                              | 438  | linear |
| AY500228.1 | <i>Bombina pachypus</i>     | <i>Bombina pachypus</i> haplotype H4<br>16S ribosomal RNA gene, partial<br>sequence; mitochondrial                                                                                              | 438  | linear |
| EU531353.1 | <i>Bombina pachypus</i>     | <i>Bombina pachypus</i> voucher TU-<br>ST16 12S ribosomal RNA gene,<br>partial sequence; tRNA-Val gene,<br>complete sequence; and 16S<br>ribosomal RNA gene, partial<br>sequence; mitochondrial | 1956 | linear |
| GQ380402.1 | <i>Bufo bufo</i>            | <i>Bufo bufo</i> 16S ribosomal RNA<br>gene, partial sequence;<br>mitochondrial                                                                                                                  | 540  | linear |
| MG199041.1 | <i>Bufo bufo</i>            | <i>Bufo bufo</i> 16S ribosomal RNA<br>gene, partial sequence;<br>mitochondrial                                                                                                                  | 504  | linear |
| AY555020.1 | <i>Bufo bufo</i>            | <i>Bufo bufo</i> from Italy 16S ribosomal<br>RNA gene, partial sequence;<br>mitochondrial                                                                                                       | 936  | linear |
| JN647221.1 | <i>Bufo spinosus</i>        | <i>Bufo spinosus</i> isolate BspinBB10<br>16S ribosomal RNA gene, partial<br>sequence; mitochondrial                                                                                            | 513  | linear |
| JN653292.1 | <i>Bufo torrenticola</i>    | <i>Bufo torrenticola</i> isolate<br>BtorrBB100 16S ribosomal RNA<br>gene, partial sequence;<br>mitochondrial                                                                                    | 505  | linear |
| JQ348764.1 | <i>Bufo verrucosissimus</i> | <i>Bufo verrucosissimus</i> isolate 124<br>16S ribosomal RNA gene, partial<br>sequence; mitochondrial                                                                                           | 565  | linear |
| EU497418.1 | <i>Bufo balearicus</i>      | <i>Bufo balearicus</i> isolate B6 16S<br>ribosomal RNA gene, partial<br>sequence; mitochondrial                                                                                                 | 610  | linear |
| EU497419.1 | <i>Bufo balearicus</i>      | <i>Bufo balearicus</i> isolate B7 16S<br>ribosomal RNA gene, partial<br>sequence; mitochondrial                                                                                                 | 610  | linear |
| EU497420.1 | <i>Bufo balearicus</i>      | <i>Bufo balearicus</i> isolate B8 16S<br>ribosomal RNA gene, partial<br>sequence; mitochondrial                                                                                                 | 610  | linear |
| EU497421.1 | <i>Bufo balearicus</i>      | <i>Bufo balearicus</i> isolate B9 16S<br>ribosomal RNA gene, partial<br>sequence; mitochondrial                                                                                                 | 610  | linear |
| EU497422.1 | <i>Bufo balearicus</i>      | <i>Bufo balearicus</i> isolate B10 16S<br>ribosomal RNA gene, partial<br>sequence; mitochondrial                                                                                                | 610  | linear |

|            |                           |                                                                                            |     |        |
|------------|---------------------------|--------------------------------------------------------------------------------------------|-----|--------|
| EU497423.1 | <i>Bufotes balearicus</i> | <i>Bufo balearicus</i> isolate B11 16S ribosomal RNA gene, partial sequence; mitochondrial | 609 | linear |
| EU497424.1 | <i>Bufotes balearicus</i> | <i>Bufo balearicus</i> isolate B12 16S ribosomal RNA gene, partial sequence; mitochondrial | 609 | linear |
| EU497425.1 | <i>Bufotes balearicus</i> | <i>Bufo balearicus</i> isolate B13 16S ribosomal RNA gene, partial sequence; mitochondrial | 609 | linear |
| EU497426.1 | <i>Bufotes balearicus</i> | <i>Bufo balearicus</i> isolate B14 16S ribosomal RNA gene, partial sequence; mitochondrial | 609 | linear |
| EU497427.1 | <i>Bufotes balearicus</i> | <i>Bufo balearicus</i> isolate B15 16S ribosomal RNA gene, partial sequence; mitochondrial | 609 | linear |
| EU497428.1 | <i>Bufotes balearicus</i> | <i>Bufo balearicus</i> isolate B16 16S ribosomal RNA gene, partial sequence; mitochondrial | 609 | linear |
| EU497429.1 | <i>Bufotes balearicus</i> | <i>Bufo balearicus</i> isolate B17 16S ribosomal RNA gene, partial sequence; mitochondrial | 609 | linear |
| EU497430.1 | <i>Bufotes balearicus</i> | <i>Bufo balearicus</i> isolate B18 16S ribosomal RNA gene, partial sequence; mitochondrial | 610 | linear |
| EU497431.1 | <i>Bufotes balearicus</i> | <i>Bufo balearicus</i> isolate B19 16S ribosomal RNA gene, partial sequence; mitochondrial | 610 | linear |
| EU497432.1 | <i>Bufotes balearicus</i> | <i>Bufo balearicus</i> isolate B20 16S ribosomal RNA gene, partial sequence; mitochondrial | 609 | linear |
| EU497433.1 | <i>Bufotes balearicus</i> | <i>Bufo balearicus</i> isolate B21 16S ribosomal RNA gene, partial sequence; mitochondrial | 610 | linear |
| EU497434.1 | <i>Bufotes balearicus</i> | <i>Bufo balearicus</i> isolate B22 16S ribosomal RNA gene, partial sequence; mitochondrial | 610 | linear |
| EU497435.1 | <i>Bufotes balearicus</i> | <i>Bufo balearicus</i> isolate B23 16S ribosomal RNA gene, partial sequence; mitochondrial | 610 | linear |
| EU497436.1 | <i>Bufotes balearicus</i> | <i>Bufo balearicus</i> isolate B24 16S ribosomal RNA gene, partial sequence; mitochondrial | 610 | linear |
| EU497437.1 | <i>Bufotes balearicus</i> | <i>Bufo balearicus</i> isolate B25 16S ribosomal RNA gene, partial sequence; mitochondrial | 610 | linear |
| EU497462.1 | <i>Bufotes balearicus</i> | <i>Bufo balearicus</i> isolate B50 16S ribosomal RNA gene, partial sequence; mitochondrial | 609 | linear |
| EU497463.1 | <i>Bufotes balearicus</i> | <i>Bufo balearicus</i> isolate B51 16S ribosomal RNA gene, partial sequence; mitochondrial | 609 | linear |

|            |                           |                                                                                            |     |        |
|------------|---------------------------|--------------------------------------------------------------------------------------------|-----|--------|
| EU497464.1 | <i>Bufotes balearicus</i> | <i>Bufo balearicus</i> isolate B52 16S ribosomal RNA gene, partial sequence; mitochondrial | 609 | linear |
| EU497465.1 | <i>Bufotes balearicus</i> | <i>Bufo balearicus</i> isolate B53 16S ribosomal RNA gene, partial sequence; mitochondrial | 609 | linear |
| EU497466.1 | <i>Bufotes balearicus</i> | <i>Bufo balearicus</i> isolate B54 16S ribosomal RNA gene, partial sequence; mitochondrial | 609 | linear |
| EU497467.1 | <i>Bufotes balearicus</i> | <i>Bufo balearicus</i> isolate B55 16S ribosomal RNA gene, partial sequence; mitochondrial | 609 | linear |
| EU497468.1 | <i>Bufotes balearicus</i> | <i>Bufo balearicus</i> isolate B56 16S ribosomal RNA gene, partial sequence; mitochondrial | 609 | linear |
| EU497469.1 | <i>Bufotes balearicus</i> | <i>Bufo balearicus</i> isolate B57 16S ribosomal RNA gene, partial sequence; mitochondrial | 609 | linear |
| EU497470.1 | <i>Bufotes balearicus</i> | <i>Bufo balearicus</i> isolate B58 16S ribosomal RNA gene, partial sequence; mitochondrial | 609 | linear |
| EU497471.1 | <i>Bufotes balearicus</i> | <i>Bufo balearicus</i> isolate B59 16S ribosomal RNA gene, partial sequence; mitochondrial | 609 | linear |
| EU497472.1 | <i>Bufotes balearicus</i> | <i>Bufo balearicus</i> isolate B60 16S ribosomal RNA gene, partial sequence; mitochondrial | 609 | linear |
| EU497473.1 | <i>Bufotes balearicus</i> | <i>Bufo balearicus</i> isolate B61 16S ribosomal RNA gene, partial sequence; mitochondrial | 609 | linear |
| EU497474.1 | <i>Bufotes balearicus</i> | <i>Bufo balearicus</i> isolate B62 16S ribosomal RNA gene, partial sequence; mitochondrial | 609 | linear |
| EU497475.1 | <i>Bufotes balearicus</i> | <i>Bufo balearicus</i> isolate B63 16S ribosomal RNA gene, partial sequence; mitochondrial | 609 | linear |
| EU497476.1 | <i>Bufotes balearicus</i> | <i>Bufo balearicus</i> isolate B64 16S ribosomal RNA gene, partial sequence; mitochondrial | 609 | linear |
| EU497477.1 | <i>Bufotes balearicus</i> | <i>Bufo balearicus</i> isolate B65 16S ribosomal RNA gene, partial sequence; mitochondrial | 609 | linear |
| EU497478.1 | <i>Bufotes balearicus</i> | <i>Bufo balearicus</i> isolate B66 16S ribosomal RNA gene, partial sequence; mitochondrial | 609 | linear |
| EU497479.1 | <i>Bufotes balearicus</i> | <i>Bufo balearicus</i> isolate B67 16S ribosomal RNA gene, partial sequence; mitochondrial | 609 | linear |
| KC984245.1 | <i>Carassius auratus</i>  | <i>Carassius auratus</i> 16S ribosomal RNA gene, partial sequence; mitochondrial           | 229 | linear |



|            |                                  |                                                                                                    |                |
|------------|----------------------------------|----------------------------------------------------------------------------------------------------|----------------|
| KU238073.1 | <i>Carassius auratus</i>         | <i>Carassius auratus</i> 16S ribosomal RNA gene, partial sequence; mitochondrial                   | 612 linear     |
| MH161806.1 | <i>Carassius auratus</i>         | <i>Carassius auratus</i> 16S ribosomal RNA gene, partial sequence; mitochondrial                   | 495 linear     |
| KJ476998.1 | <i>Carassius auratus</i>         | <i>Carassius auratus</i> mitochondrion, complete genome                                            | 16580 circular |
| KJ874428.1 | <i>Carassius auratus</i>         | <i>Carassius auratus</i> mitochondrion, complete genome                                            | 16580 circular |
| MF443758.1 | <i>Carassius auratus auratus</i> | <i>Carassius auratus auratus</i> isolate J1 mitochondrion, complete genome                         | 16580 circular |
| MF443759.1 | <i>Carassius auratus auratus</i> | <i>Carassius auratus auratus</i> isolate J2 mitochondrion, complete genome                         | 16580 circular |
| MF443760.1 | <i>Carassius auratus auratus</i> | <i>Carassius auratus auratus</i> isolate J3 mitochondrion, complete genome                         | 16580 circular |
| MF443761.1 | <i>Carassius auratus auratus</i> | <i>Carassius auratus auratus</i> isolate J4 mitochondrion, complete genome                         | 16580 circular |
| MF443762.1 | <i>Carassius auratus auratus</i> | <i>Carassius auratus auratus</i> isolate J5 mitochondrion, complete genome                         | 16580 circular |
| MF443763.1 | <i>Carassius auratus auratus</i> | <i>Carassius auratus auratus</i> isolate J6 mitochondrion, complete genome                         | 16580 circular |
| MF443764.1 | <i>Carassius auratus auratus</i> | <i>Carassius auratus auratus</i> isolate J7 mitochondrion, complete genome                         | 16580 circular |
| MF443765.1 | <i>Carassius auratus auratus</i> | <i>Carassius auratus auratus</i> isolate J8 mitochondrion, complete genome                         | 16580 circular |
| AB111951.1 | <i>Carassius auratus auratus</i> | <i>Carassius auratus auratus</i> mitochondrial DNA, complete genome                                | 16580 linear   |
| AP011236.1 | <i>Carassius auratus auratus</i> | <i>Carassius auratus auratus</i> mitochondrial DNA, complete genome                                | 16580 circular |
| AB379915.1 | <i>Carassius auratus auratus</i> | <i>Carassius auratus auratus</i> mitochondrial DNA, partial sequence, isolate: G18                 | 9292 linear    |
| AB379916.1 | <i>Carassius auratus auratus</i> | <i>Carassius auratus auratus</i> mitochondrial DNA, partial sequence, isolate: G19                 | 9294 linear    |
| KR476838.1 | <i>Carassius carassius</i>       | <i>Carassius carassius</i> isolate Carcar1 16S ribosomal RNA gene, partial sequence; mitochondrial | 512 linear     |

|            |                                 |                                                                                                                    |       |          |
|------------|---------------------------------|--------------------------------------------------------------------------------------------------------------------|-------|----------|
| KR476920.1 | <i>Carassius carassius</i>      | <i>Carassius carassius isolate Carcar2 16S ribosomal RNA gene, partial sequence; mitochondrial</i>                 | 216   | linear   |
| AY714387.1 | <i>Carassius carassius</i>      | <i>Carassius carassius mitochondrion, complete genome</i>                                                          | 16580 | circular |
| JQ911695.1 | <i>Carassius carassius</i>      | <i>Carassius carassius mitochondrion, complete genome</i>                                                          | 16597 | circular |
| KX781320.1 | <i>Carassius carassius</i>      | <i>Carassius carassius mitochondrion, complete genome</i>                                                          | 16580 | circular |
| KJ128723.1 | <i>Carassius carassius</i>      | <i>Carassius carassius voucher NRM:47877 16S ribosomal RNA gene, partial sequence; mitochondrial</i>               | 535   | linear   |
| KJ128724.1 | <i>Carassius carassius</i>      | <i>Carassius carassius voucher NRM:52860 16S ribosomal RNA gene, partial sequence; mitochondrial</i>               | 555   | linear   |
| KR476925.1 | <i>Cobitis taenia</i>           | <i>Cobitis taenia isolate Cobtae1 16S ribosomal RNA gene, partial sequence; mitochondrial</i>                      | 512   | linear   |
| KR476844.1 | <i>Cobitis taenia</i>           | <i>Cobitis taenia isolate Cobtae2 16S ribosomal RNA gene, partial sequence; mitochondrial</i>                      | 514   | linear   |
| AJ247080.1 | <i>Cobitis taenia</i>           | <i>Cobitis taenia partial mitochondrial 16S rRNA gene</i>                                                          | 427   | linear   |
| KJ128742.1 | <i>Cobitis taenia</i>           | <i>Cobitis taenia voucher NRM:51845 16S ribosomal RNA gene, partial sequence; mitochondrial</i>                    | 555   | linear   |
| KJ128743.1 | <i>Cobitis taenia</i>           | <i>Cobitis taenia voucher NRM:52492 16S ribosomal RNA gene, partial sequence; mitochondrial</i>                    | 555   | linear   |
| AJ275218.1 | <i>Corallotaenia intermedia</i> | <i>Corallotaenia intermedia mitochondrial partial 16S rRNA gene</i>                                                | 427   | linear   |
| DQ845935.1 | <i>Cyprinus carpio</i>          | <i>Cyprinus carpio 16S ribosomal RNA gene, partial sequence; mitochondrial</i>                                     | 1678  | linear   |
| DQ983941.1 | <i>Cyprinus carpio</i>          | <i>Cyprinus carpio 16S ribosomal RNA gene, partial sequence; mitochondrial</i>                                     | 612   | linear   |
| AP009047.1 | <i>Cyprinus carpio</i>          | <i>Cyprinus carpio mitochondrial DNA, complete genome</i>                                                          | 16580 | circular |
| AB741888.1 | <i>Cyprinus carpio</i>          | <i>Cyprinus carpio mitochondrial gene for 16S ribosomal RNA, partial sequence, country: Japan: Kochi, Shimanto</i> | 623   | linear   |
| KF856965.1 | <i>Cyprinus carpio</i>          | <i>Cyprinus carpio mitochondrion, complete genome</i>                                                              | 16581 | circular |

|             |                                |                                                                                                                              |       |          |
|-------------|--------------------------------|------------------------------------------------------------------------------------------------------------------------------|-------|----------|
| JN105352.1  | <i>Cyprinus carpio carpio</i>  | <i>Cyprinus carpio carpio</i><br>mitochondrion, complete genome                                                              | 16581 | circular |
| KJ168065.1  | <i>Dicentrarchus labrax</i>    | <i>Dicentrarchus labrax</i> isolate<br>DLmgm57 mitochondrion,<br>complete genome                                             | 18253 | circular |
| NC_026074.1 | <i>Dicentrarchus labrax</i>    | <i>Dicentrarchus labrax</i> isolate<br>DLP8F mitochondrion, complete<br>genome                                               | 18253 | circular |
| KJ168064.1  | <i>Dicentrarchus labrax</i>    | <i>Dicentrarchus labrax</i><br>mitochondrial partial 16S rRNA<br>gene, isolate 489                                           | 17704 | circular |
| FN687953.1  | <i>Dicentrarchus labrax</i>    | <i>Dicentrarchus labrax</i> voucher 460<br>16S ribosomal RNA gene, partial<br>sequence; mitochondrial                        | 489   | linear   |
| GQ485284.1  | <i>Dicentrarchus labrax</i>    | <i>Dicentrarchus labrax</i> voucher<br>GO905 16S ribosomal RNA gene,<br>partial sequence; mitochondrial                      | 554   | linear   |
| HQ731430.1  | <i>Dicentrarchus labrax</i>    | <i>Dicentrarchus labrax</i> voucher<br>NRM:49173 16S ribosomal RNA<br>gene, partial sequence;                                | 1315  | linear   |
| KJ128761.1  | <i>Dicentrarchus labrax</i>    | mitochondrial                                                                                                                | 554   | linear   |
| NC_031617.1 | <i>Enteromius eburneensis</i>  | <i>Barbus eburneensis</i> mitochondrial<br>DNA, complete genome                                                              | 16678 | circular |
| AP011377.1  | <i>Enteromius fasciolatus</i>  | <i>Barbus fasciolatus</i> mitochondrial<br>DNA, complete genome                                                              | 16566 | circular |
| NC_033914.1 | <i>Enteromius pobeguini</i>    | <i>Barbus pobeguini</i> mitochondrial<br>DNA, complete genome                                                                | 16933 | circular |
| AB239600.1  | <i>Enteromius trimaculatus</i> | <i>Barbus trimaculatus</i> mitochondrial<br>DNA, complete genome                                                             | 16417 | circular |
| AF060446.1  | <i>Esox lucius</i>             | <i>Esox lucius</i> 16S ribosomal RNA<br>gene, mitochondrial gene for<br>mitochondrial RNA, partial<br>sequence               | 565   | linear   |
| AF262309.1  | <i>Esox lucius</i>             | <i>Esox lucius</i> isolate 1 16S<br>ribosomal RNA gene, partial<br>sequence; mitochondrial gene for<br>mitochondrial product | 370   | linear   |
| KR476850.1  | <i>Esox lucius</i>             | <i>Esox lucius</i> isolate Esoluc1 16S<br>ribosomal RNA gene, partial<br>sequence; mitochondrial                             | 453   | linear   |
| KR476932.1  | <i>Esox lucius</i>             | <i>Esox lucius</i> isolate Esoluc3 16S<br>ribosomal RNA gene, partial<br>sequence; mitochondrial                             | 508   | linear   |
| AP004103.1  | <i>Esox lucius</i>             | <i>Esox lucius</i> mitochondrial DNA,<br>complete genome                                                                     | 16695 | circular |
| NC_004593.1 | <i>Esox lucius</i>             | <i>Esox lucius</i> mitochondrion,<br>complete genome                                                                         | 16695 | circular |

|            |                           |                                                                                                                                                              |     |        |
|------------|---------------------------|--------------------------------------------------------------------------------------------------------------------------------------------------------------|-----|--------|
| FJ425099.1 | <i>Esox lucius</i>        | <i>Esox lucius</i> voucher BBGY 101<br>16S ribosomal RNA gene, partial<br>sequence; mitochondrial                                                            | 519 | linear |
| KJ128767.1 | <i>Esox lucius</i>        | <i>Esox lucius</i> voucher NRM:51663<br>16S ribosomal RNA gene, partial<br>sequence; mitochondrial                                                           | 553 | linear |
| U80050.1   | <i>Gambusia holbrooki</i> | <i>Gambusia holbrooki</i> 16S<br>ribosomal RNA gene,<br>mitochondrial gene encoding<br>mitochondrial rRNA, partial<br>sequence                               | 448 | linear |
| KM435020.1 | <i>Gambusia holbrooki</i> | <i>Gambusia holbrooki</i> 16S<br>ribosomal RNA gene, partial<br>sequence; mitochondrial                                                                      | 316 | linear |
| LC198798.1 | <i>Gambusia holbrooki</i> | <i>Gambusia holbrooki</i> mitochondrial<br>gene for 16S ribosomal RNA,<br>partial sequence, isolation_source:<br>aquarium water sample 1                     | 81  | linear |
| LC198799.1 | <i>Gambusia holbrooki</i> | <i>Gambusia holbrooki</i> mitochondrial<br>gene for 16S ribosomal RNA,<br>partial sequence, isolation_source:<br>aquarium water sample 5                     | 81  | linear |
| LC198797.1 | <i>Gambusia holbrooki</i> | <i>Gambusia holbrooki</i> mitochondrial<br>gene for 16S ribosomal RNA,<br>partial sequence, isolation_source:<br>laboratory tissue sample<br>G_holbrooki_010 | 78  | linear |
| LC198800.1 | <i>Gambusia holbrooki</i> | <i>Gambusia holbrooki</i> mitochondrial<br>gene for 16S ribosomal RNA,<br>partial sequence, isolation_source:<br>water sample 1 from Ebro River<br>point 1   | 85  | linear |
| LC198801.1 | <i>Gambusia holbrooki</i> | <i>Gambusia holbrooki</i> mitochondrial<br>gene for 16S ribosomal RNA,<br>partial sequence, isolation_source:<br>water sample 2 from Ebro River<br>point 2   | 76  | linear |
| LC198802.1 | <i>Gambusia holbrooki</i> | <i>Gambusia holbrooki</i> mitochondrial<br>gene for 16S ribosomal RNA,<br>partial sequence, isolation_source:<br>water sample 3 from Ebro River<br>point 3   | 76  | linear |
| LC198803.1 | <i>Gambusia holbrooki</i> | <i>Gambusia holbrooki</i> mitochondrial<br>gene for 16S ribosomal RNA,<br>partial sequence, isolation_source:<br>water sample 4 from Ebro River<br>point 4   | 77  | linear |
| LC198804.1 | <i>Gambusia holbrooki</i> | <i>Gambusia holbrooki</i> mitochondrial<br>gene for 16S ribosomal RNA,<br>partial sequence, isolation_source:                                                | 77  | linear |

|             |                                   |                                                                                                                                             |       |          |
|-------------|-----------------------------------|---------------------------------------------------------------------------------------------------------------------------------------------|-------|----------|
|             |                                   | water sample 5 from Ebro River<br>point 5                                                                                                   |       |          |
|             |                                   | <i>Gambusia holbrooki</i> voucher<br>LodgeLab Gholbrooki_1                                                                                  |       |          |
| KP013085.1  | <i>Gambusia holbrooki</i>         | mitochondrion, complete genome                                                                                                              | 16611 | circular |
|             |                                   | <i>Gambusia holbrooki</i> voucher<br>LodgeLab Gholbrooki_1                                                                                  |       |          |
| NC_028274.1 | <i>Gambusia holbrooki</i>         | mitochondrion, complete genome                                                                                                              | 16611 | circular |
|             |                                   | <i>Gambusia holbrooki</i> voucher<br>LodgeLab Gholbrooki_2                                                                                  |       |          |
| KP013115.1  | <i>Gambusia holbrooki</i>         | mitochondrion, complete genome                                                                                                              | 16611 | circular |
|             |                                   | <i>Gasterosteus aculeatus</i> 16S<br>ribosomal RNA gene, partial<br>sequence; mitochondrial                                                 | 540   | linear   |
| DQ027919.1  | <i>Gasterosteus<br/>aculeatus</i> | <i>Gasterosteus aculeatus</i> 16S<br>ribosomal RNA gene, partial<br>sequence; mitochondrial gene for<br>mitochondrial product               | 523   | linear   |
| AF355030.1  | <i>Gasterosteus<br/>aculeatus</i> | <i>Gasterosteus aculeatus</i> haplotype<br>Ga1 16S ribosomal RNA gene,<br>partial sequence; mitochondrial<br>gene for mitochondrial product | 418   | linear   |
| AY283358.1  | <i>Gasterosteus<br/>aculeatus</i> | <i>Gasterosteus aculeatus</i> haplotype<br>Gac1 16S ribosomal RNA gene,<br>partial sequence; mitochondrial                                  | 600   | linear   |
| KJ627974.1  | <i>Gasterosteus<br/>aculeatus</i> | <i>Gasterosteus aculeatus</i> isolate A9<br>16S ribosomal RNA gene, partial<br>sequence; mitochondrial                                      | 544   | linear   |
| DQ077967.1  | <i>Gasterosteus<br/>aculeatus</i> | <i>Gasterosteus aculeatus</i> isolate B1<br>16S ribosomal RNA gene, partial<br>sequence; mitochondrial                                      | 590   | linear   |
| DQ077966.1  | <i>Gasterosteus<br/>aculeatus</i> | <i>Gasterosteus aculeatus</i> isolate B2<br>16S ribosomal RNA gene, partial<br>sequence; mitochondrial                                      | 587   | linear   |
| DQ077965.1  | <i>Gasterosteus<br/>aculeatus</i> | <i>Gasterosteus aculeatus</i> isolate B3<br>16S ribosomal RNA gene, partial<br>sequence; mitochondrial                                      | 566   | linear   |
| DQ077964.1  | <i>Gasterosteus<br/>aculeatus</i> | <i>Gasterosteus aculeatus</i> isolate B4<br>16S ribosomal RNA gene, partial<br>sequence; mitochondrial                                      | 590   | linear   |
| DQ077963.1  | <i>Gasterosteus<br/>aculeatus</i> | <i>Gasterosteus aculeatus</i> isolate B5<br>16S ribosomal RNA gene, partial<br>sequence; mitochondrial                                      | 586   | linear   |
| DQ077962.1  | <i>Gasterosteus<br/>aculeatus</i> | <i>Gasterosteus aculeatus</i> isolate<br>DM180 mitochondrion, partial<br>genome                                                             | 16599 | linear   |
| MN122917.1  | <i>Gasterosteus<br/>aculeatus</i> | <i>Gasterosteus aculeatus</i><br>mitochondrion, complete genome                                                                             | 16543 | circular |
| MH205729.1  | <i>Gasterosteus<br/>aculeatus</i> | <i>Gasterosteus aculeatus</i> voucher<br>UW:049025 16S ribosomal RNA                                                                        | 580   | linear   |
| EF458412.1  | <i>Gasterosteus<br/>aculeatus</i> |                                                                                                                                             |       |          |

|             |                              |                                                                                                                             |       |          |
|-------------|------------------------------|-----------------------------------------------------------------------------------------------------------------------------|-------|----------|
| AB070241.1  | <i>Hemibarbus barbus</i>     | gene, partial sequence;<br>mitochondrial<br><i>Hemibarbus barbus</i> mitochondrial<br>DNA, complete genome                  | 16681 | circular |
| KF991279.1  | <i>Humerana lateralis</i>    | <i>Pelophylax lateralis</i> voucher<br>ZFMK:92555 16S ribosomal RNA<br>gene, partial sequence;<br>mitochondrial             | 550   | linear   |
| KM282485.1  | <i>Lepomis gibbosus</i>      | <i>Lepomis gibbosus</i> 16S ribosomal<br>RNA gene, partial sequence;<br>mitochondrial                                       | 338   | linear   |
| AY742524.1  | <i>Lepomis gibbosus</i>      | <i>Lepomis gibbosus</i> isolate LgibA<br>16S ribosomal RNA gene, partial<br>sequence; mitochondrial                         | 1682  | linear   |
| NC_028284.1 | <i>Lepomis gibbosus</i>      | <i>Lepomis gibbosus</i> voucher<br>LodgeLab Lgibbosus_1<br>mitochondrion, complete genome                                   | 16503 | circular |
| MK013969.1  | <i>Lissotriton italicus</i>  | <i>Lissotriton italicus</i> 16S ribosomal<br>RNA gene, partial sequence;<br>mitochondrial                                   | 503   | linear   |
| DQ092269.1  | <i>Lissotriton italicus</i>  | <i>Triturus italicus</i> isolate E1806.18<br>16S ribosomal RNA gene, partial<br>sequence; mitochondrial                     | 557   | linear   |
| MH136825.1  | <i>Luciobarbus capito</i>    | <i>Luciobarbus capito</i> isolate DLB-B<br>mitochondrion, complete genome                                                   | 16603 | circular |
| MH136824.1  | <i>Luciobarbus capito</i>    | <i>Luciobarbus capito</i> isolate DLB-O<br>mitochondrion, complete genome                                                   | 16607 | circular |
| JX987313.1  | <i>Luciobarbus capito</i>    | <i>Luciobarbus capito</i> mitochondrial,<br>complete genome                                                                 | 16603 | circular |
| JX987313.1  | <i>Luciobarbus capito</i>    | <i>Luciobarbus capito</i> mitochondrial,<br>complete genome                                                                 | 16603 | circular |
| NC_020338.1 | <i>Luciobarbus capito</i>    | <i>Luciobarbus capito</i> mitochondrial,<br>complete genome                                                                 | 16603 | circular |
| KX348041.1  | <i>Luciobarbus rifensis</i>  | <i>Luciobarbus rifensis</i> voucher<br>MNCN-235026 mitochondrial,<br>complete genome                                        | 16607 | circular |
| AP011196.1  | <i>Luciobarbus sclateri</i>  | <i>Luciobarbus sclateri</i> mitochondrial<br>DNA, complete genome                                                           | 16608 | circular |
| NC_031532.1 | <i>Luciobarbus sclateri</i>  | <i>Luciobarbus sclateri</i> mitochondrial<br>DNA, complete genome                                                           | 16608 | circular |
| AF042466.1  | <i>Micropterus salmoides</i> | <i>Micropterus salmoides</i> 16S<br>ribosomal RNA gene,<br>mitochondrial gene for<br>mitochondrial RNA, partial<br>sequence | 401   | linear   |
| KM282489.1  | <i>Micropterus salmoides</i> | <i>Micropterus salmoides</i> 16S<br>ribosomal RNA gene, partial<br>sequence; mitochondrial                                  | 339   | linear   |
| AP014537.1  | <i>Micropterus salmoides</i> | <i>Micropterus salmoides</i><br>mitochondrial DNA, almost<br>complete genome                                                | 16165 | circular |

|             |                                           |                                                                                                 |       |          |
|-------------|-------------------------------------------|-------------------------------------------------------------------------------------------------|-------|----------|
| NC_008106.1 | <i>Micropterus salmoides</i>              | <i>Micropterus salmoides</i> mitochondrion, complete genome                                     | 16484 | circular |
| DQ307686.1  | <i>Mugil cephalus</i>                     | <i>Mugil cephalus</i> 16S ribosomal RNA gene, partial sequence; mitochondrial                   | 1317  | linear   |
| EU239812.1  | <i>Mugil cephalus</i>                     | <i>Mugil cephalus</i> 16S ribosomal RNA gene, partial sequence; mitochondrial                   | 610   | linear   |
| JQ060816.2  | <i>Mugil cephalus</i>                     | <i>Mugil cephalus</i> isolate 319 16S ribosomal RNA gene, partial sequence; mitochondrial       | 1339  | linear   |
| KM406308.1  | <i>Neogobius nigricans</i>                | <i>Neogobius nigricans</i> voucher Pn04 16S ribosomal RNA gene, partial sequence; mitochondrial | 426   | linear   |
| AF067270.1  | <i>Neogobius nigricans</i>                | <i>Neogobius nigricans</i> 16S ribosomal RNA gene, partial sequence; mitochondrial              | 491   | linear   |
| NC_001717.1 | <i>Oncorhynchus mykiss</i>                | <i>Oncorhynchus mykiss</i> mitochondrion complete genome                                        | 16642 | circular |
| L29771.1    | <i>Oncorhynchus mykiss</i>                | <i>Oncorhynchus mykiss</i> mitochondrion complete genome                                        | 16642 | circular |
| KM406309.1  | <i>Padogobius bonelli</i>                 | <i>Padogobius bonelli</i> voucher Pn09 16S ribosomal RNA gene, partial sequence; mitochondrial  | 423   | linear   |
| AF067274.1  | <i>Padogobius martensii</i>               | <i>Padogobius martensii</i> 16S ribosomal RNA gene, partial sequence; mitochondrial             | 483   | linear   |
| EF218652.1  | <i>Padogobius martensii</i>               | <i>Padogobius martensii</i> 16S ribosomal RNA gene, partial sequence; mitochondrial             | 545   | linear   |
| NC_029200.1 | <i>Pelophylax bedriagae</i>               | <i>Pelophylax bedriagae</i> isolate GM-J0142 mitochondrion, complete genome                     | 17968 | circular |
| NC_029196.1 | <i>Pelophylax cf. bedriagae</i> AFL1      | <i>Pelophylax cf. bedriagae</i> AFL1 mitochondrion, complete genome                             | 17977 | circular |
| NC_029199.1 | <i>Pelophylax cf. terentievi</i> MPFC1736 | <i>Pelophylax cf. terentievi</i> MPFC1736 mitochondrion, complete genome                        | 17990 | circular |
| NC_025575.1 | <i>Pelophylax cretensis</i>               | <i>Pelophylax cretensis</i> isolate CR03 mitochondrion, complete genome                         | 17829 | circular |
| NC_026894.1 | <i>Pelophylax epeiroticus</i>             | <i>Pelophylax epeiroticus</i> isolate MPFC1392 mitochondrion, complete genome                   | 18030 | circular |
| MN122883.1  | <i>Pelophylax esculentus</i>              | <i>Pelophylax esculentus</i> mitochondrion, partial genome                                      | 16525 | linear   |

|             |                                      |                                                                                                                                                                                                                                                                                              |       |          |
|-------------|--------------------------------------|----------------------------------------------------------------------------------------------------------------------------------------------------------------------------------------------------------------------------------------------------------------------------------------------|-------|----------|
| NC_026895.1 | <i>Pelophylax kurtmuelleri</i>       | <i>Pelophylax kurtmuelleri</i> isolate MPFC1475 mitochondrion, complete genome                                                                                                                                                                                                               | 18020 | circular |
| MH410480.1  | <i>Pelophylax lessonae</i>           | <i>Pelophylax lessonae</i> voucher F59 16S ribosomal RNA gene, partial sequence; mitochondrial <i>Pelophylax nigromaculatus</i> isolate SCUM045199CJ 12S ribosomal RNA gene, partial sequence; tRNA-Val gene, complete sequence; and 16S ribosomal RNA gene, partial sequence; mitochondrial | 538   | linear   |
| KX269216.1  | <i>Pelophylax nigromaculatus</i>     | <i>Pelophylax perezii</i> voucher SPM2256 16S ribosomal RNA gene, partial sequence; mitochondrial                                                                                                                                                                                            | 1965  | linear   |
| KY762042.1  | <i>Pelophylax perezii</i>            | <i>Pelophylax plancyi</i> voucher NIBRAM0000000038 16S ribosomal RNA gene, partial sequence; mitochondrial                                                                                                                                                                                   | 538   | linear   |
| JQ815307.1  | <i>Pelophylax plancyi</i>            | <i>Pelophylax porosus brevipodus</i> Pp1 mitochondrial gene for 16S rRNA, partial sequence                                                                                                                                                                                                   | 558   | linear   |
| LC389209.1  | <i>Pelophylax porosus brevipodus</i> | <i>Pelophylax ridibundus</i> voucher F51 16S ribosomal RNA gene, partial sequence; mitochondrial                                                                                                                                                                                             | 537   | linear   |
| MH410472.1  | <i>Pelophylax ridibundus</i>         | <i>Pelophylax saharicus</i> voucher MNHN:2011-558 16S ribosomal RNA gene, partial sequence; mitochondrial                                                                                                                                                                                    | 538   | linear   |
| KP177567.1  | <i>Pelophylax saharicus</i>          | <i>Perca fluviatilis</i> 16S mitochondrial ribosomal RNA mitochondrial gene, partial sequence                                                                                                                                                                                                | 459   | linear   |
| U87422.1    | <i>Perca fluviatilis</i>             | <i>Perca fluviatilis</i> 16S ribosomal RNA gene, partial sequence; mitochondrial                                                                                                                                                                                                             | 430   | linear   |
| JQ999985.1  | <i>Perca fluviatilis</i>             | <i>Perca fluviatilis</i> 16S ribosomal RNA gene, partial sequence; mitochondrial gene for                                                                                                                                                                                                    | 1103  | linear   |
| AF518221.1  | <i>Perca fluviatilis</i>             | <i>Perca fluviatilis</i> 16S ribosomal RNA gene, partial sequence; mitochondrial gene for                                                                                                                                                                                                    | 784   | linear   |
| AY141442.1  | <i>Perca fluviatilis</i>             | <i>Perca fluviatilis</i> 16S ribosomal RNA gene, partial sequence; mitochondrial gene for                                                                                                                                                                                                    | 388   | linear   |
| AY254567.1  | <i>Perca fluviatilis</i>             | <i>Perca fluviatilis</i> mitochondrial product                                                                                                                                                                                                                                               | 507   | linear   |



|            |                          |                                                                                                    |       |          |
|------------|--------------------------|----------------------------------------------------------------------------------------------------|-------|----------|
| MH271189.1 | <i>Perca fluviatilis</i> | <i>Perca fluviatilis</i> haplotype 01-SK03 16S ribosomal RNA gene, partial sequence; mitochondrial | 541   | linear   |
| MH271188.1 | <i>Perca fluviatilis</i> | <i>Perca fluviatilis</i> haplotype 05-IT02 16S ribosomal RNA gene, partial sequence; mitochondrial | 541   | linear   |
| MH271187.1 | <i>Perca fluviatilis</i> | <i>Perca fluviatilis</i> haplotype 09-CZ05 16S ribosomal RNA gene, partial sequence; mitochondrial | 541   | linear   |
| MG969725.1 | <i>Perca fluviatilis</i> | <i>Perca fluviatilis</i> haplotype H1 16S ribosomal RNA gene, partial sequence; mitochondrial      | 541   | linear   |
| MG969726.1 | <i>Perca fluviatilis</i> | <i>Perca fluviatilis</i> haplotype H2 16S ribosomal RNA gene, partial sequence; mitochondrial      | 540   | linear   |
| MG969727.1 | <i>Perca fluviatilis</i> | <i>Perca fluviatilis</i> haplotype H3 16S ribosomal RNA gene, partial sequence; mitochondrial      | 541   | linear   |
| MG969728.1 | <i>Perca fluviatilis</i> | <i>Perca fluviatilis</i> haplotype H4 16S ribosomal RNA gene, partial sequence; mitochondrial      | 540   | linear   |
| MG969731.1 | <i>Perca fluviatilis</i> | <i>Perca fluviatilis</i> haplotype H5 16S ribosomal RNA gene, partial sequence; mitochondrial      | 541   | linear   |
| MG969732.1 | <i>Perca fluviatilis</i> | <i>Perca fluviatilis</i> haplotype H6 16S ribosomal RNA gene, partial sequence; mitochondrial      | 541   | linear   |
| MG969733.1 | <i>Perca fluviatilis</i> | <i>Perca fluviatilis</i> haplotype H7 16S ribosomal RNA gene, partial sequence; mitochondrial      | 541   | linear   |
| MG969734.1 | <i>Perca fluviatilis</i> | <i>Perca fluviatilis</i> haplotype H8 16S ribosomal RNA gene, partial sequence; mitochondrial      | 541   | linear   |
| MG969735.1 | <i>Perca fluviatilis</i> | <i>Perca fluviatilis</i> haplotype H9 16S ribosomal RNA gene, partial sequence; mitochondrial      | 541   | linear   |
| MG969736.1 | <i>Perca fluviatilis</i> | <i>Perca fluviatilis</i> haplotype H10 16S ribosomal RNA gene, partial sequence; mitochondrial     | 541   | linear   |
| MG969737.1 | <i>Perca fluviatilis</i> | <i>Perca fluviatilis</i> haplotype H11 16S ribosomal RNA gene, partial sequence; mitochondrial     | 541   | linear   |
| KR476954.1 | <i>Perca fluviatilis</i> | <i>Perca fluviatilis</i> isolate Perflu1 16S ribosomal RNA gene, partial sequence; mitochondrial   | 510   | linear   |
| KR476873.1 | <i>Perca fluviatilis</i> | <i>Perca fluviatilis</i> isolate Perflu9 16S ribosomal RNA gene, partial sequence; mitochondrial   | 511   | linear   |
| AP005995.1 | <i>Perca fluviatilis</i> | <i>Perca fluviatilis</i> mitochondrial DNA, complete genome                                        | 16537 | circular |

|             |                            |                                                                                                     |       |          |
|-------------|----------------------------|-----------------------------------------------------------------------------------------------------|-------|----------|
| KM410088.1  | <i>Perca fluviatilis</i>   | <i>Perca fluviatilis</i> mitochondrion, complete genome                                             | 16537 | circular |
| NC_026313.1 | <i>Perca fluviatilis</i>   | <i>Perca fluviatilis</i> mitochondrion, complete genome                                             | 16537 | circular |
| HQ731432.1  | <i>Perca fluviatilis</i>   | <i>Perca fluviatilis</i> voucher KU2567 16S ribosomal RNA gene, partial sequence; mitochondrial     | 568   | linear   |
| MG969729.1  | <i>Perca schrenkii</i>     | <i>Perca schrenkii</i> haplotype H1 16S ribosomal RNA gene, partial sequence; mitochondrial         | 541   | linear   |
| MG969730.1  | <i>Perca schrenkii</i>     | <i>Perca schrenkii</i> haplotype H2 16S ribosomal RNA gene, partial sequence; mitochondrial         | 541   | linear   |
| HQ623651.1  | <i>Petromyzon marinus</i>  | <i>Petromyzon marinus</i> 16S ribosomal RNA gene, partial sequence; mitochondrial                   | 90    | linear   |
| EU404074.1  | <i>Petromyzon marinus</i>  | <i>Petromyzon marinus</i> haplotype Pma71 16S ribosomal RNA gene, partial sequence; mitochondrial   | 463   | linear   |
| U11880.1    | <i>Petromyzon marinus</i>  | <i>Petromyzon marinus</i> mitochondrion, complete genome                                            | 16201 | circular |
| KJ128854.1  | <i>Petromyzon marinus</i>  | <i>Petromyzon marinus</i> voucher NRM:50292 16S ribosomal RNA gene, partial sequence; mitochondrial | 525   | linear   |
| KJ533240.1  | <i>Plotosus lineatus</i>   | <i>Plotosus lineatus</i> isolate QP1 16S ribosomal RNA gene, partial sequence; mitochondrial        | 563   | linear   |
| KJ533241.1  | <i>Plotosus lineatus</i>   | <i>Plotosus lineatus</i> isolate QP2 16S ribosomal RNA gene, partial sequence; mitochondrial        | 563   | linear   |
| KU213641.1  | <i>Plotosus lineatus</i>   | <i>Plotosus lineatus</i> mitochondrion, complete genome                                             | 16480 | circular |
| NC_029714.1 | <i>Plotosus lineatus</i>   | <i>Plotosus lineatus</i> mitochondrion, complete genome                                             | 16480 | circular |
| DQ532941.1  | <i>Pomatomus saltatrix</i> | <i>Pomatomus saltatrix</i> 16S large subunit ribosomal RNA gene, partial sequence; mitochondrial    | 549   | linear   |
| FJ374805.1  | <i>Pomatomus saltatrix</i> | <i>Pomatomus saltatrix</i> 16S ribosomal RNA gene, partial sequence; mitochondrial                  | 1613  | linear   |
| HQ623631.1  | <i>Pomatomus saltatrix</i> | <i>Pomatomus saltatrix</i> 16S small subunit ribosomal RNA gene, partial sequence; mitochondrial    | 119   | linear   |
| AF055612.1  | <i>Pomatomus saltatrix</i> | <i>Pomatomus saltatrix</i> gene for mitochondrial RNA                                               | 571   | linear   |
| AB355904.1  | <i>Pomatomus saltatrix</i> | <i>Pomatomus saltatrix</i> mitochondrial DNA, complete genome                                       | 16544 | circular |

|             |                                     |                                                                                                                    |       |          |
|-------------|-------------------------------------|--------------------------------------------------------------------------------------------------------------------|-------|----------|
| NC_022507.1 | <i>Pomatomus saltatrix</i>          | <i>Pomatomus saltatrix</i><br>mitochondrion, complete genome                                                       | 16544 | circular |
| JQ938975.1  | <i>Pomatomus saltatrix</i>          | <i>Pomatomus saltatrix</i> voucher<br>KU3992 16S ribosomal RNA gene,<br>partial sequence; mitochondrial            | 679   | linear   |
| EU410419.1  | <i>Pomatomus saltatrix</i>          | <i>Pomatomus saltatrix</i> voucher<br>Pomsal/58 16S ribosomal RNA<br>gene, partial sequence;<br>mitochondrial      | 556   | linear   |
| DQ447706.1  | <i>Protochondrostoma genei</i>      | <i>Chondrostoma genei</i> 16S<br>ribosomal RNA gene, partial<br>sequence; mitochondrial                            | 566   | linear   |
| EU853289.1  | <i>Protochondrostoma genei</i>      | <i>Chondrostoma genei</i> isolate<br>ProgenBO1 16S ribosomal RNA<br>gene, partial sequence;<br>mitochondrial       | 540   | linear   |
| EU853290.1  | <i>Protochondrostoma genei</i>      | <i>Chondrostoma genei</i> isolate<br>ProgenBO2 16S ribosomal RNA<br>gene, partial sequence;<br>mitochondrial       | 540   | linear   |
| AJ247057.1  | <i>Protochondrostoma genei</i>      | <i>Chondrostoma genei</i> partial<br>mitochondrial 16S rRNA gene                                                   | 425   | linear   |
| DQ447703.1  | <i>Pseudochondrostoma polylepis</i> | <i>Chondrostoma polylepis</i> 16S<br>ribosomal RNA gene, partial<br>sequence; mitochondrial                        | 581   | linear   |
| AP011282.1  | <i>Pseudochondrostoma polylepis</i> | <i>Pseudochondrostoma polylepis</i><br>mitochondrial DNA, complete<br>genome                                       | 16606 | circular |
| NC_031574.1 | <i>Pseudochondrostoma polylepis</i> | <i>Pseudochondrostoma polylepis</i><br>mitochondrial DNA, complete<br>genome                                       | 16606 | circular |
| GQ406307.1  | <i>Pseudorasbora parva</i>          | <i>Pseudorasbora parva</i> 16S<br>ribosomal RNA gene, partial<br>sequence                                          | 1682  | linear   |
| KU238078.1  | <i>Pseudorasbora parva</i>          | <i>Pseudorasbora parva</i> 16S<br>ribosomal RNA gene, partial<br>sequence; mitochondrial                           | 619   | linear   |
| KJ135626.1  | <i>Pseudorasbora parva</i>          | <i>Pseudorasbora parva</i><br>mitochondrion, complete genome                                                       | 16601 | circular |
| NC_015614.1 | <i>Pseudorasbora parva</i>          | <i>Pseudorasbora parva</i><br>mitochondrion, complete genome                                                       | 16600 | circular |
| AB719223.1  | <i>Pulchrana glandulosa</i>         | <i>Rana glandulosa</i> mitochondrial<br>gene for 16S rRNA, partial<br>sequence, specimen_voucher:<br>KUHE:53618    | 1170  | linear   |
| AY147942.1  | <i>Rana graeca</i>                  | <i>Rana graeca</i> 16S ribosomal RNA<br>gene, partial sequence;<br>mitochondrial gene for<br>mitochondrial product | 1168  | linear   |
| AY043078.1  | <i>Rana italica</i>                 | <i>Rana italica</i> 16S ribosomal RNA<br>gene, partial sequence;                                                   | 206   | linear   |

|            |                            |                                                                                                                                                               |       |          |
|------------|----------------------------|---------------------------------------------------------------------------------------------------------------------------------------------------------------|-------|----------|
| AY147945.1 | <i>Rana italica</i>        | mitochondrial gene for mitochondrial product<br><i>Rana italica</i> 16S ribosomal RNA gene, partial sequence;<br>mitochondrial gene for mitochondrial product | 1165  | linear   |
| KP222281.1 | <i>Rana sylvatica</i>      | <i>Rana sylvatica</i> mitochondrion, complete genome                                                                                                          | 17343 | circular |
| MH536744.1 | <i>Rana temporaria</i>     | <i>Rana temporaria</i> mitochondrion, complete genome                                                                                                         | 16061 | circular |
| AB430342.1 | <i>Rugosa rugosa</i>       | <i>Rana rugosa</i> mitochondrial genes for 12S rRNA, tRNA-Val, 16S rRNA, partial and complete sequence, haplotype: XY                                         | 2325  | linear   |
| EU853296.1 | <i>Rutilus aula</i>        | <i>Rutilus aula</i> isolate Rutery 16S ribosomal RNA gene, partial sequence; mitochondrial                                                                    | 539   | linear   |
| KR476883.1 | <i>Rutilus meidingeri</i>  | <i>Rutilus meidingeri</i> isolate Rutmei1 16S ribosomal RNA gene, partial sequence; mitochondrial                                                             | 510   | linear   |
| KR476965.1 | <i>Rutilus meidingeri</i>  | <i>Rutilus meidingeri</i> isolate Rutmei2 16S ribosomal RNA gene, partial sequence; mitochondrial                                                             | 512   | linear   |
| GQ406271.1 | <i>Rutilus rutilus</i>     | <i>Rutilus rutilus</i> 16S ribosomal RNA gene, partial sequence                                                                                               | 1689  | linear   |
| AP010775.1 | <i>Rutilus rutilus</i>     | <i>Rutilus rutilus</i> mitochondrial DNA, complete genome                                                                                                     | 16606 | circular |
| FJ465725.1 | <i>Salaria fluviatilis</i> | <i>Salaria fluviatilis</i> 16S ribosomal RNA gene, partial sequence; mitochondrial                                                                            | 586   | linear   |
| AY098843.1 | <i>Salaria fluviatilis</i> | <i>Salaria fluviatilis</i> from Portugal 16S ribosomal RNA gene, partial sequence; mitochondrial gene for mitochondrial product                               | 574   | linear   |
| HQ623636.1 | <i>Salmo trutta</i>        | <i>Salmo trutta</i> 16S ribosomal RNA gene, partial sequence; mitochondrial                                                                                   | 121   | linear   |
| KC441986.1 | <i>Salmo trutta</i>        | <i>Salmo trutta</i> 16S ribosomal RNA gene, partial sequence; mitochondrial                                                                                   | 392   | linear   |
| LT617632.1 | <i>Salmo trutta</i>        | <i>Salmo trutta</i> mitochondrial genome, specimen voucher MNHN_IC_1977_272_A                                                                                 | 16677 | circular |
| LT617631.1 | <i>Salmo trutta</i>        | <i>Salmo trutta</i> mitochondrial genome, specimen voucher MNHN_IC_A_7585                                                                                     | 16677 | circular |
| JQ390057.1 | <i>Salmo trutta</i>        | <i>Salmo trutta</i> mitochondrion, complete genome                                                                                                            | 16677 | circular |
| AF446373.1 | <i>Salmo trutta fario</i>  | <i>Salmo trutta fario</i> isolate 2 pop-variant Dol-ME 16S ribosomal RNA gene, partial sequence;                                                              | 372   | linear   |

|             |                                        |                                                                                                                                                    |       |          |
|-------------|----------------------------------------|----------------------------------------------------------------------------------------------------------------------------------------------------|-------|----------|
| LC137015.1  | <i>Salmo trutta fario</i>              | mitochondrial gene for<br>mitochondrial product<br><i>Salmo trutta fario</i> mitochondrial<br>DNA, complete genome,<br>collection_date: 2014-11-19 | 16687 | circular |
| KT633607.1  | <i>Salmo trutta fario</i>              | <i>Salmo trutta fario</i> mitochondrion,<br>complete genome                                                                                        | 16677 | circular |
| X77562.1    | <i>Salmo trutta<br/>macrostigma</i>    | <i>Salmo trutta macrostigma</i><br>mitochondrial gene for 16S<br>ribosomal RNA                                                                     | 343   | linear   |
| X77521.1    | <i>Salmo trutta<br/>macrostigma</i>    | <i>Salmo trutta macrostigma</i><br>mitochondrial gene for cytochrome<br>b                                                                          | 249   | linear   |
| AM910409.1  | <i>Salmo trutta trutta</i>             | <i>Salmo trutta trutta</i> complete<br>mitochondrial genome, specimen<br>voucher Nor 00                                                            | 16677 | circular |
| NC_010007.1 | <i>Salmo trutta trutta</i>             | <i>Salmo trutta trutta</i> mitochondrion,<br>complete genome                                                                                       | 16677 | circular |
| EU853297.1  | <i>Sarmarutilus rubilio</i>            | <i>Rutilus rubilio</i> isolate RutrubBO<br>16S ribosomal RNA gene, partial<br>sequence; mitochondrial                                              | 539   | linear   |
| EU853299.1  | <i>Sarmarutilus rubilio</i>            | <i>Rutilus rubilio</i> isolate RutrubCH<br>16S ribosomal RNA gene, partial<br>sequence; mitochondrial                                              | 539   | linear   |
| EU853298.1  | <i>Sarmarutilus rubilio</i>            | <i>Rutilus rubilio</i> isolate RutrubPG<br>16S ribosomal RNA gene, partial<br>sequence; mitochondrial                                              | 539   | linear   |
| AJ247059.1  | <i>Sarmarutilus rubilio</i>            | <i>Rutilus rubilio</i> partial<br>mitochondrial 16S rRNA gene                                                                                      | 425   | linear   |
| AJ247066.1  | <i>Scardinius<br/>erythrophthalmus</i> | <i>Scardinius erythrophthalmus</i> partial<br>mitochondrial 16S rRNA gene,<br>isolate 2                                                            | 428   | linear   |
| AF215479.1  | <i>Scardinius<br/>erythrophthalmus</i> | <i>Scardinius erythrophthalmus</i> 16S<br>ribosomal RNA gene, partial<br>sequence; mitochondrial                                                   | 572   | linear   |
| EF372635.1  | <i>Scardinius<br/>erythrophthalmus</i> | <i>Scardinius erythrophthalmus</i> 16S<br>ribosomal RNA gene, partial<br>sequence; mitochondrial                                                   | 484   | linear   |
| KR476897.1  | <i>Scardinius<br/>erythrophthalmus</i> | <i>Scardinius erythrophthalmus</i><br>isolate Scaery2 16S ribosomal<br>RNA gene, partial sequence;<br>mitochondrial                                | 517   | linear   |
| EU853295.1  | <i>Scardinius<br/>erythrophthalmus</i> | <i>Scardinius erythrophthalmus</i><br>isolate Scaery 16S ribosomal RNA<br>gene, partial sequence;<br>mitochondrial                                 | 539   | linear   |
| AP011263.1  | <i>Scardinius<br/>erythrophthalmus</i> | <i>Scardinius erythrophthalmus</i><br>mitochondrial DNA, complete<br>genome                                                                        | 16607 | circular |

|             |                                    |                                                                                                              |       |          |
|-------------|------------------------------------|--------------------------------------------------------------------------------------------------------------|-------|----------|
| NC_031561.1 | <i>Scardinius erythrophthalmus</i> | <i>Scardinius erythrophthalmus</i> mitochondrial DNA, complete genome                                        | 16607 | circular |
| KJ128896.1  | <i>Scardinius erythrophthalmus</i> | <i>Scardinius erythrophthalmus</i> voucher NRM:48318 16S ribosomal RNA gene, partial sequence; mitochondrial | 553   | linear   |
| KJ128895.1  | <i>Scardinius erythrophthalmus</i> | <i>Scardinius erythrophthalmus</i> voucher NRM:48655 16S ribosomal RNA gene, partial sequence; mitochondrial | 553   | linear   |
| EF095593.1  | <i>Sparus aurata</i>               | <i>Sparus aurata</i> 16S ribosomal RNA gene, partial sequence; mitochondrial                                 | 391   | linear   |
| KC984230.1  | <i>Sparus aurata</i>               | <i>Sparus aurata</i> 16S ribosomal RNA gene, partial sequence; mitochondrial                                 | 229   | linear   |
| AF247432.1  | <i>Sparus aurata</i>               | <i>Sparus aurata</i> mitochondrial gene for mitochondrial product                                            | 576   | linear   |
| LK022698.1  | <i>Sparus aurata</i>               | <i>Sparus aurata</i> mitochondrial complete genome                                                           | 16652 | circular |
| NC_024236.1 | <i>Sparus aurata</i>               | <i>Sparus aurata</i> mitochondrial complete genome                                                           | 16652 | circular |
| FN688245.1  | <i>Sparus aurata</i>               | <i>Sparus aurata</i> mitochondrial partial 16S rRNA gene, isolate 456                                        | 489   | linear   |
| FN688246.1  | <i>Sparus aurata</i>               | <i>Sparus aurata</i> mitochondrial partial 16S rRNA gene, isolate 459                                        | 489   | linear   |
| FN688247.1  | <i>Sparus aurata</i>               | <i>Sparus aurata</i> mitochondrial partial 16S rRNA gene, isolate 464                                        | 489   | linear   |
| FN688248.1  | <i>Sparus aurata</i>               | <i>Sparus aurata</i> mitochondrial partial 16S rRNA gene, isolate 789                                        | 489   | linear   |
| FN688249.1  | <i>Sparus aurata</i>               | <i>Sparus aurata</i> mitochondrial partial 16S rRNA gene, isolate 834                                        | 489   | linear   |
| FN688243.1  | <i>Sparus aurata</i>               | <i>Sparus aurata</i> mitochondrial partial 16S rRNA gene, isolate 1960                                       | 489   | linear   |
| FN688244.1  | <i>Sparus aurata</i>               | <i>Sparus aurata</i> mitochondrial partial 16S rRNA gene, isolate 1962                                       | 489   | linear   |
| KT805959.1  | <i>Sparus aurata</i>               | <i>Sparus aurata</i> mitochondrion, complete genome                                                          | 16652 | circular |
| AJ247279.1  | <i>Sparus aurata</i>               | <i>Sparus aurata</i> partial mitochondrial 16S rRNA gene                                                     | 479   | linear   |
| GQ485281.1  | <i>Sparus aurata</i>               | <i>Sparus aurata</i> voucher 864 16S ribosomal RNA gene, partial sequence; mitochondrial                     | 552   | linear   |
| AJ247054.1  | <i>Squalius cephalus</i>           | <i>Leuciscus cephalus</i> partial mitochondrial 16S rRNA gene                                                | 864   | linear   |

|             |                           |                                                                                                    |       |          |
|-------------|---------------------------|----------------------------------------------------------------------------------------------------|-------|----------|
| EU853292.1  | <i>Squalius cephalus</i>  | <i>Squalius cephalus</i> isolate LeucepBO2 16S ribosomal RNA gene, partial sequence; mitochondrial | 539   | linear   |
| AP011214.1  | <i>Squalius cephalus</i>  | <i>Squalius cephalus</i> mitochondrial DNA, complete genome                                        | 16612 | circular |
| NC_031540.1 | <i>Squalius cephalus</i>  | <i>Squalius cephalus</i> mitochondrial DNA, complete genome                                        | 16612 | circular |
| EU530554.1  | <i>Syngnathus abaster</i> | <i>Syngnathus abaster</i> isolate c1 16S ribosomal RNA gene, partial sequence; mitochondrial       | 519   | linear   |
| EU530555.1  | <i>Syngnathus abaster</i> | <i>Syngnathus abaster</i> isolate c2 16S ribosomal RNA gene, partial sequence; mitochondrial       | 519   | linear   |
| EU530556.1  | <i>Syngnathus abaster</i> | <i>Syngnathus abaster</i> isolate c3 16S ribosomal RNA gene, partial sequence; mitochondrial       | 519   | linear   |
| EU530557.1  | <i>Syngnathus abaster</i> | <i>Syngnathus abaster</i> isolate c4 16S ribosomal RNA gene, partial sequence; mitochondrial       | 519   | linear   |
| JF306314.1  | <i>Syngnathus abaster</i> | <i>Syngnathus abaster</i> isolate cd01 16S ribosomal RNA gene, partial sequence; mitochondrial     | 519   | linear   |
| JF306315.1  | <i>Syngnathus abaster</i> | <i>Syngnathus abaster</i> isolate cd02 16S ribosomal RNA gene, partial sequence; mitochondrial     | 519   | linear   |
| JF306316.1  | <i>Syngnathus abaster</i> | <i>Syngnathus abaster</i> isolate cd03 16S ribosomal RNA gene, partial sequence; mitochondrial     | 519   | linear   |
| JF306317.1  | <i>Syngnathus abaster</i> | <i>Syngnathus abaster</i> isolate cd04 16S ribosomal RNA gene, partial sequence; mitochondrial     | 519   | linear   |
| JF306318.1  | <i>Syngnathus abaster</i> | <i>Syngnathus abaster</i> isolate cd05 16S ribosomal RNA gene, partial sequence; mitochondrial     | 519   | linear   |
| JF306319.1  | <i>Syngnathus abaster</i> | <i>Syngnathus abaster</i> isolate cd06 16S ribosomal RNA gene, partial sequence; mitochondrial     | 519   | linear   |
| JF306320.1  | <i>Syngnathus abaster</i> | <i>Syngnathus abaster</i> isolate cd07 16S ribosomal RNA gene, partial sequence; mitochondrial     | 519   | linear   |
| JF306321.1  | <i>Syngnathus abaster</i> | <i>Syngnathus abaster</i> isolate cd08 16S ribosomal RNA gene, partial sequence; mitochondrial     | 519   | linear   |
| JF306322.1  | <i>Syngnathus abaster</i> | <i>Syngnathus abaster</i> isolate cd09 16S ribosomal RNA gene, partial sequence; mitochondrial     | 519   | linear   |
| JF306323.1  | <i>Syngnathus abaster</i> | <i>Syngnathus abaster</i> isolate cd10 16S ribosomal RNA gene, partial sequence; mitochondrial     | 519   | linear   |

|            |                           |                                                                                                                               |            |
|------------|---------------------------|-------------------------------------------------------------------------------------------------------------------------------|------------|
| JF306363.1 | <i>Syngnathus abaster</i> | <i>Syngnathus abaster</i> isolate em01<br>16S ribosomal RNA gene, partial<br>sequence; mitochondrial                          | 519 linear |
| JF306364.1 | <i>Syngnathus abaster</i> | <i>Syngnathus abaster</i> isolate em02<br>16S ribosomal RNA gene, partial<br>sequence; mitochondrial                          | 519 linear |
| JF306365.1 | <i>Syngnathus abaster</i> | <i>Syngnathus abaster</i> isolate em03<br>16S ribosomal RNA gene, partial<br>sequence; mitochondrial                          | 519 linear |
| JF306366.1 | <i>Syngnathus abaster</i> | <i>Syngnathus abaster</i> isolate em04<br>16S ribosomal RNA gene, partial<br>sequence; mitochondrial                          | 519 linear |
| JF306367.1 | <i>Syngnathus abaster</i> | <i>Syngnathus abaster</i> isolate em05<br>16S ribosomal RNA gene, partial<br>sequence; mitochondrial                          | 519 linear |
| JF306368.1 | <i>Syngnathus abaster</i> | <i>Syngnathus abaster</i> isolate em06<br>16S ribosomal RNA gene, partial<br>sequence; mitochondrial                          | 519 linear |
| JF306325.1 | <i>Syngnathus abaster</i> | <i>Syngnathus abaster</i> isolate sc02<br>16S ribosomal RNA gene, partial<br>sequence; mitochondrial                          | 519 linear |
| JF306374.1 | <i>Syngnathus abaster</i> | <i>Syngnathus abaster</i> isolate ts01<br>16S ribosomal RNA gene, partial<br>sequence; mitochondrial                          | 519 linear |
| JF306378.1 | <i>Syngnathus abaster</i> | <i>Syngnathus abaster</i> isolate ts04<br>16S ribosomal RNA gene, partial<br>sequence; mitochondrial                          | 519 linear |
| JF306390.1 | <i>Syngnathus abaster</i> | <i>Syngnathus abaster</i> isolate vn05<br>16S ribosomal RNA gene, partial<br>sequence; mitochondrial                          | 519 linear |
| JF306394.1 | <i>Syngnathus abaster</i> | <i>Syngnathus abaster</i> isolate vn09<br>16S ribosomal RNA gene, partial<br>sequence; mitochondrial                          | 519 linear |
| JF306400.1 | <i>Syngnathus abaster</i> | <i>Syngnathus abaster</i> isolate vs05<br>16S ribosomal RNA gene, partial<br>sequence; mitochondrial                          | 519 linear |
| AF355010.1 | <i>Syngnathus abaster</i> | <i>Syngnathus abaster</i> S23 16S<br>ribosomal RNA gene, partial<br>sequence; mitochondrial gene for<br>mitochondrial product | 549 linear |
| DQ447688.1 | <i>Telestes souffia</i>   | <i>Leuciscus souffia</i> 16S ribosomal<br>RNA gene, partial sequence;<br>mitochondrial                                        | 557 linear |
| AJ247049.1 | <i>Telestes souffia</i>   | <i>Leuciscus souffia</i> partial<br>mitochondrial 16S rRNA gene,<br>isolate 2                                                 | 423 linear |
| AJ247050.1 | <i>Telestes souffia</i>   | <i>Leuciscus souffia</i> partial<br>mitochondrial 16S rRNA gene,<br>isolate 3                                                 | 423 linear |



|             |                         |                                                                                                                                                                                                                                                                           |       |          |
|-------------|-------------------------|---------------------------------------------------------------------------------------------------------------------------------------------------------------------------------------------------------------------------------------------------------------------------|-------|----------|
| AJ247051.1  | <i>Telestes souffia</i> | <i>Leuciscus souffia</i> partial mitochondrial 16S rRNA gene, isolate 4                                                                                                                                                                                                   | 423   | linear   |
| GQ406280.1  | <i>Tinca tinca</i>      | <i>Tinca tinca</i> 16S ribosomal RNA gene, partial sequence                                                                                                                                                                                                               | 1688  | linear   |
| KR476983.1  | <i>Tinca tinca</i>      | <i>Tinca tinca</i> isolate Tintin1 16S ribosomal RNA gene, partial sequence; mitochondrial                                                                                                                                                                                | 512   | linear   |
| KR476902.1  | <i>Tinca tinca</i>      | <i>Tinca tinca</i> isolate Tintin2 16S ribosomal RNA gene, partial sequence; mitochondrial                                                                                                                                                                                | 517   | linear   |
| EU853302.1  | <i>Tinca tinca</i>      | <i>Tinca tinca</i> isolate Tintin 16S ribosomal RNA gene, partial sequence; mitochondrial                                                                                                                                                                                 | 538   | linear   |
| AB218686.1  | <i>Tinca tinca</i>      | <i>Tinca tinca</i> mitochondrial DNA, complete genome                                                                                                                                                                                                                     | 16612 | circular |
| NC_008648.1 | <i>Tinca tinca</i>      | <i>Tinca tinca</i> mitochondrion, complete genome                                                                                                                                                                                                                         | 16612 | circular |
| AJ247053.1  | <i>Tinca tinca</i>      | <i>Tinca tinca</i> partial mitochondrial 16S rRNA gene                                                                                                                                                                                                                    | 423   | linear   |
| KJ128924.1  | <i>Tinca tinca</i>      | <i>Tinca tinca</i> voucher NRM:52453 16S ribosomal RNA gene, partial sequence; mitochondrial                                                                                                                                                                              | 552   | linear   |
| KJ128925.1  | <i>Tinca tinca</i>      | <i>Tinca tinca</i> voucher NRM:54985 16S ribosomal RNA gene, partial sequence; mitochondrial                                                                                                                                                                              | 552   | linear   |
| JF812096.1  | <i>Tinca tinca</i>      | <i>Tinca tinca</i> voucher PLFRS-24 16S ribosomal RNA gene, partial sequence; tRNA-Leu gene, complete sequence; NADH dehydrogenase subunit 1 (ND1) gene, complete cds; tRNA-Ile and tRNA-Gln genes, complete sequence; and tRNA-Met gene, partial sequence; mitochondrial | 1971  | linear   |

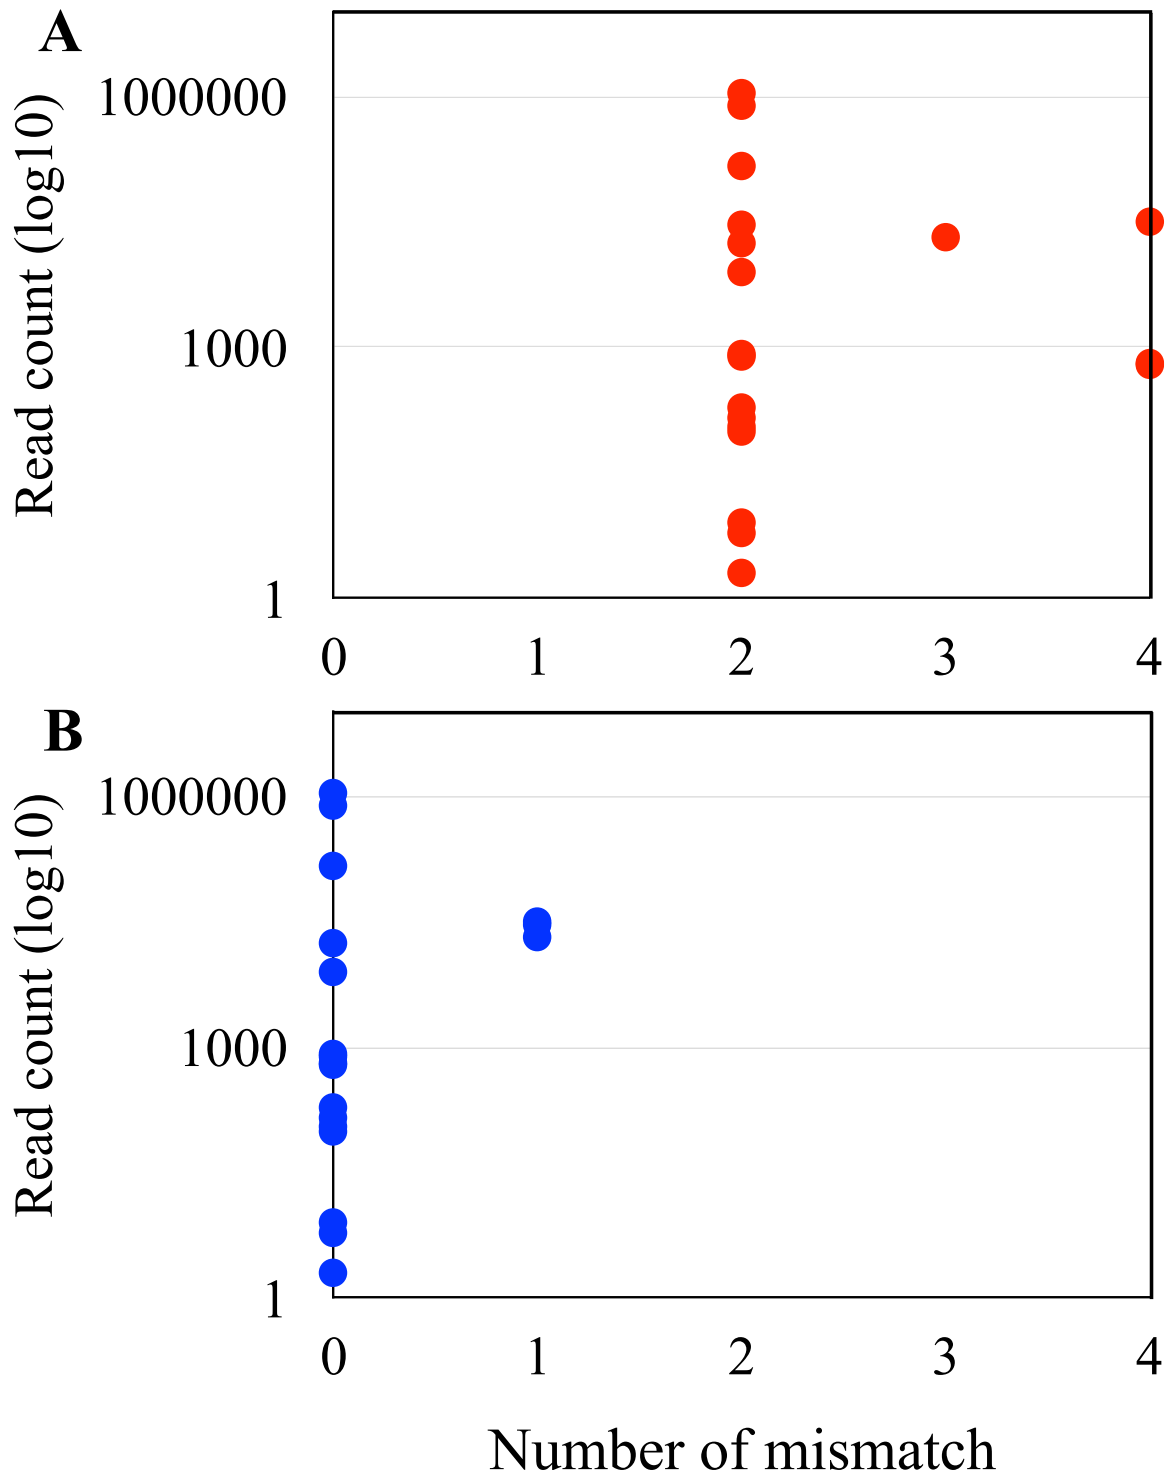

**Supplemental Figure S1. Valuation of primers**

The correlation of the number of mismatches on primer and read count for A) primer forward and B) reverse.

## Supplemental information

### Bioinformatic analysis

Raw data from DNA metabarcondig analysis on DNA extracted from excrements of the Eurasian otter (*Lutra lutra*). **Pool 1:** 41\_S1\_R1\_001.fastq.gz/41\_S1\_R2\_001.fastq.gz; **Pool 2:** 42\_S2\_R1\_001.fastq.gz/42\_S2\_R2\_001.fastq.gz; **Pool 3:** 43\_S3\_R1\_001.fastq.gz/43\_S3\_R2\_001.fastq.gz; **Pool 4:** 44\_S4\_R1\_001.fastq.gz/44\_S4\_R2\_001.fastq.gz; **Pool 5:** 45\_S5\_R1\_001.fastq.gz/45\_S5\_R2\_001.fastq.gz.

All sequences were deposited in the ENA's Sequence Read Archive (<http://www.ebi.ac.uk/ena>) under the accession number PRJEB38720, in FigShare at <https://figshare.com/s/10ed08094e13c539e766> and in Dryad Digital Repository at <https://datadryad.org/stash/dataset/doi:10.5061/dryad.2bvq83bn5>.
